# Supplementary material for: The Fate of Osteoblast-Like MG-63 Cells on Pre-Infected Bactericidal Nanostructured Titanium Surfaces
Source: MDPI journal article supplement (doi:10.3390/ma12101575), 2019-05-14
Supplement: s1 [file s1]

# The Fate of Osteoblast-Like MG-63 Cells on Pre-Infected Bactericidal Nanostructured Titanium Surfaces

Jason V. Wandiyanto <sup>1</sup>, Vi Khanh Truong <sup>2</sup>, Mohammad Al Kobaisi <sup>1</sup>, Saulius Juodkazis <sup>3</sup>, Helmut Thissen <sup>4</sup>, Olha Bazaka <sup>2</sup>, Kateryna Bazaka <sup>5</sup>, Russell J. Crawford <sup>2</sup> and Elena P. Ivanova <sup>2,\*</sup>

<sup>1</sup> School of Science, Faculty of Science, Engineering and Technology, Swinburne University of Technology, Hawthorn, 3122 VIC, Australia; jwandiyanto@swin.edu.au (J.V.W.); makobaisi@swin.edu.au (M.A.K.)

<sup>2</sup> School of Science, College of Science, Engineering and Health, RMIT University, Melbourne, 3000 VIC, Australia; vi.khanh.truong@rmit.edu.au (V.K.T.); olga.bazaka@rmit.edu.au (O.B.); russell.crawford@rmit.edu.au (R.J.C.)

<sup>3</sup> Center for Micro-Photonics, Faculty of Science, Engineering and Technology, Swinburne University of Technology, Hawthorn, 3122 VIC, Australia; Sjudkzis@swin.edu.au

<sup>4</sup> CSIRO Manufacturing, Clayton, 3168 VIC, Australia; helmut.thiessen@csiro.com

<sup>5</sup> Institute for Future Environments, Queensland University of Technology, GPO Box 2434, Brisbane, QLD 4001, Australia; katerina.bazaka@qut.edu.au

\* Correspondence: elena.ivanova@rmit.edu.au

## MG-63 on flat AR-Ti surface

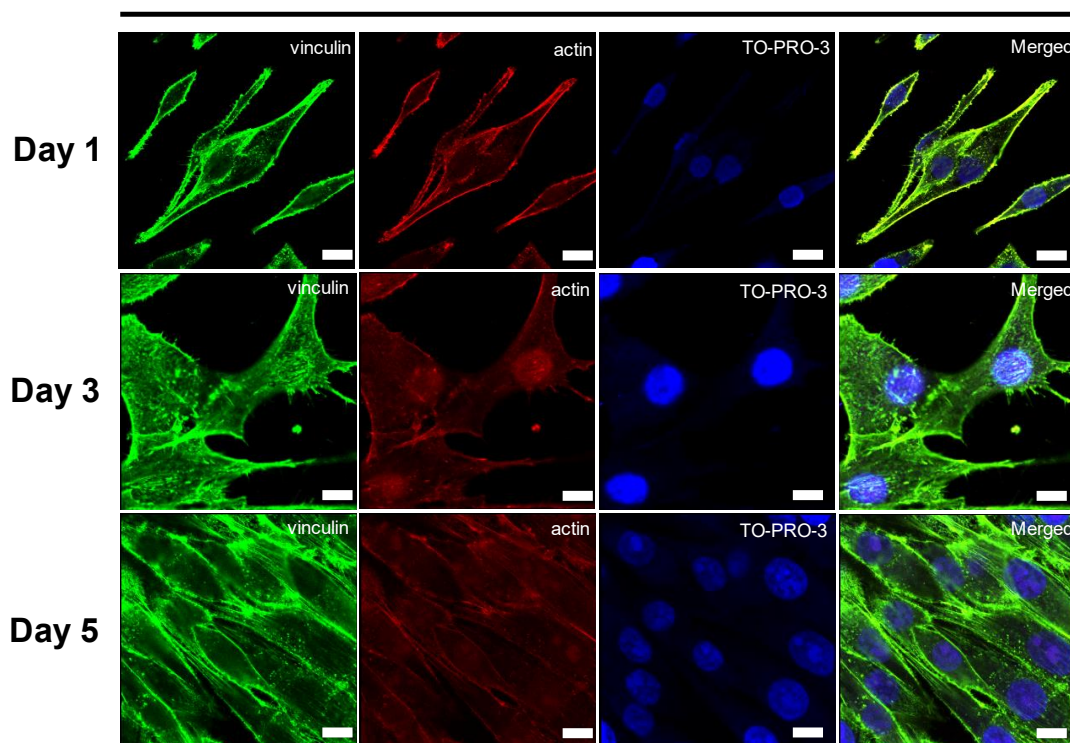

**Figure S1.** Immunohistochemistry staining of proteins associated with growth and proliferation of MG-63 cells on AR-Ti. Vinculin, actin, and To-PRO3 were stained in green, red and blue, respectively. Cells were able to adhere to AR-Ti surface, as well as on pre-infected HTE-Ti surfaces. However, the cells on AR-Ti were not able to produce as many filopodia as the cells adhered to HTE-Ti surfaces.
